# Supplementary material for: Pharmacological Treatment in the Management of Chronic Subdural Hematoma
Source: Frontiers journal article supplement (doi:10.3389/fnagi.2021.684501), 2021-07-01
Supplement: Table_5.docx [file Table_5.docx]

| Outcomes | Direct comparison | Direct Estimate (95% CrI) | Indirect Estimate  (95% CrI) | Inconsistency P value |
| --- | --- | --- | --- | --- |
| Recurrence | TXA vs Goreisan | 0.10 (0.01, 0.62) | 1.45 (0.42, 4.80) | 0.016 |

Supplemental Table S5: Node-splitting model results for the outcomes.
