# Supplementary material for: Pharmacological Treatment in the Management of Chronic Subdural Hematoma
Source: Frontiers journal article supplement (doi:10.3389/fnagi.2021.684501), 2021-07-01
Supplement: Table_6.docx [file Table_6.docx]

Supplemental Table S6: GRADE summary for the outcomes

1. Recurrence required for surgery

| Atorvastatin |  |  |  |  |
| --- | --- | --- | --- | --- |
| Low #§ | Dexamethasone |  |  |  |
| Low #§ | Low #§ | Goreisan |  |  |
| Low #§ | Low #§ | Low #& | Tranexamic acid |  |
| High | High | Moderate # | Moderate # | Placebo |

1. Changes in hematoma volume

| Atorvastatin |  |  |  |  |
| --- | --- | --- | --- | --- |
| Low #§ | Goreisan |  |  |  |
| Very low*§ | Very low*§ | Perindopril |  |  |
| Low #§ | Moderate # | Very low*§ | Tranexamic acid |  |
| High | Moderate # | Low * | Moderate # | Placebo |

1. Good recovery

| Atorvastatin |  |  |
| --- | --- | --- |
| Low #§ | Dexamethasone |  |
| Moderate # | Moderate # | Placebo |

1. All-cause mortality

| Atorvastatin |  |  |
| --- | --- | --- |
| Very low *§ | Dexamethasone |  |
| Low * | Moderate # | Placebo |

# serious imprecision

*very serious imprecision

§ serious indirection

& serious inconsistency
